# Supplementary material
Source: HighWire-hosted journal article supplement (https://www.rcpjournals.org/highwire/filestream/13058/field_highwire_adjunct_files/2/Han_Supplementary_material_S3.pdf)
Supplement: Han_Supplementary_material_S3.pdf [file Han_Supplementary_material_S3.pdf]

**Supplementary Table S3.** Proportions of patients readmitted with the same condition according the frequency of admission within 28 days of discharge from hospital.

| Index admissions             | Categories of frequency and type of readmission |                            |                              |                        |                          | Group differences |          |
|------------------------------|-------------------------------------------------|----------------------------|------------------------------|------------------------|--------------------------|-------------------|----------|
|                              | No readmission                                  | 1 non-identical AR episode | ≥2 non-identical AR episodes | 1 identical AR episode | ≥2 identical AR episodes | $\chi^2$          | <i>p</i> |
| CHF                          | 1.1                                             | 2.5                        | 3.0                          | 3.7                    | 5.6                      | 87.5              | <0.001   |
| COPD                         | 1.3                                             | 2.2                        | 4.4                          | 4.2                    | 8.4                      | 121.9             | <0.001   |
| Pneumonia                    | 4.5                                             | 9.3                        | 10.7                         | 14.7                   | 11.2                     | 203.7             | <0.001   |
| Sepsis                       | 3.4                                             | 5.2                        | 7.0                          | 3.7                    | 2.8                      | 53.0              | <0.001   |
| Endocrine disorders          | 3.3                                             | 4.1                        | 3.8                          | 2.6                    | 8.4                      | 14.0              | 0.007    |
| UTI                          | 3.1                                             | 5.7                        | 6.3                          | 4.7                    | 12.1                     | 96.4              | <0.001   |
| Psychiatric disorders        | 0.8                                             | 1.3                        | 2.2                          | 0.5                    | 0.9                      | 26.7              | <0.001   |
| Haematological disorders     | 2.2                                             | 1.0                        | 0.9                          | 3.2                    | 1.9                      | 24.8              | <0.001   |
| Dermatological disorders     | 3.4                                             | 2.5                        | 3.5                          | 7.9                    | 2.8                      | 17.4              | 0.002    |
| MI                           | 2.5                                             | 2.3                        | 1.8                          | 1.1                    | 0                        | 6.6               | 0.162    |
| AF                           | 1.3                                             | 0.8                        | 1.5                          | 1.1                    | 0                        | 5.8               | 0.211    |
| Asthma                       | 0.7                                             | 0.5                        | 0.5                          | 0.5                    | 0                        | 2.1               | 0.723    |
| Strokes                      | 2.7                                             | 2.4                        | 2.5                          | 1.6                    | 1.9                      | 1.9               | 0.748    |
| Viral infection              | 0.5                                             | 0.2                        | 0.2                          | 1.1                    | 0.0                      | 6.0               | 0.202    |
| Gastrointestinal disorders   | 12.9                                            | 12.5                       | 10.6                         | 12.1                   | 15.0                     | 5.2               | 0.270    |
| All Neurological disorders   | 2.3                                             | 1.9                        | 3.0                          | 1.6                    | 0.9                      | 5.1               | 0.278    |
| Ophthalmic disorders         | 0.5                                             | 0.2                        | 0.3                          | 0.0                    | 0.0                      | 9.0               | 0.062    |
| All cardiovascular diseases  | 13.7                                            | 13.3                       | 13.4                         | 13.2                   | 9.3                      | 2.3               | 0.689    |
| All pulmonary disorders      | 9.4                                             | 16.4                       | 20.5                         | 22.6                   | 28.0                     | 292.9             | <0.001   |
| Rheumatological disorders    | 10.5                                            | 5.3                        | 2.7                          | 2.6                    | 1.9                      | 145.9             | <0.001   |
| All genitourinary disorders  | 11.3                                            | 12.3                       | 11.8                         | 12.6                   | 15.0                     | 3.8               | 0.437    |
| Non-specific bodily pain     | 13.8                                            | 12.0                       | 8.5                          | 11.6                   | 7.5                      | 31.1              | <0.001   |
| Bone fractures               | 8.2                                             | 8.1                        | 7.2                          | 2.6                    | 1.9                      | 14.8              | 0.005    |
| Medical device complications | 3.1                                             | 3.8                        | 4.3                          | 2.1                    | 3.7                      | 9.8               | 0.044    |

AR, admission-readmission; CHF, congestive heart failure; COPD, chronic obstructive pulmonary disease; UTI, urinary tract infection; MI, myocardial infarct; AF, atrial fibrillation
